# Supplementary material
Source: PubMed Central journal article supplement (PMC1896034)
Supplement: cmaj_177_1_41_v2_1.pdf [file cmaj_177_1_41_v2_1.pdf]

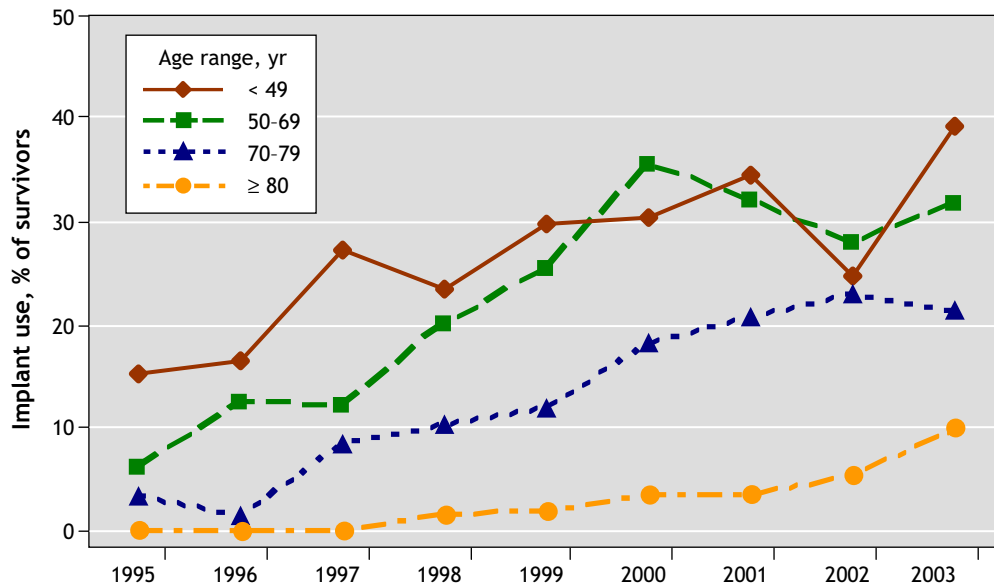

**Appendix 3:** Percentage of Canadian patients, by age, who had an out-of-hospital cardiac arrest and who survived until hospital discharge and received an implantable cardioverter defibrillator between 1995 and 2004. (Data points centre on fiscal years, which end on March 31.)
